# Supplementary material for: Single-step conversion of silathiogermylene to germaacid anhydrides: unusual reactivity
Source: Royal Society of Chemistry journal article supplement (doi:10.1039/c5cc00169b), 2015-01-01
Supplement: c5cc00169b1.pdf [file c5cc00169b1.pdf]

## *Supporting Information*

### **A Single-Step Conversion of Silathiogermylene to Germaacid**

#### **Anhydrides: An Unusual Reactivity**

Surendar Karwasara<sup>a</sup>, Dhirendra Yadav<sup>a</sup>, Chandan Kumar Jha<sup>a</sup>, Gopalan Rajaraman<sup>b</sup>, and Selvarajan

Nagendran\*<sup>a</sup>

<sup>a</sup>Department of Chemistry, Indian Institute of Technology Delhi, Hauz Khas, New Delhi 110 016, India

<sup>b</sup>Department of Chemistry, Indian Institute of Technology Bombay, Powai, Mumbai 400 076, India

| <b>Content</b>                                                                                                                                                     | <b>Page<br/>No.</b> |
|--------------------------------------------------------------------------------------------------------------------------------------------------------------------|---------------------|
| Experimental procedures                                                                                                                                            | 3                   |
| Scheme S1. Various reaction pathways and their thermochemical feasibility for the formation of compound <b>3</b> from compound <b>2</b> and elemental selenium     | 6                   |
| Table S1. Thermochemical variables for reactants, products, and reaction steps shown in scheme S1                                                                  | 7                   |
| X-ray data collection for compounds <b>3</b> and <b>4</b>                                                                                                          | 8                   |
| Table S2. Crystal data and refinement parameters                                                                                                                   | 9                   |
| Figure S1: Molecular structure of $\{(Bu^i_2ATI)Ge(S)\}_2S$ ( <b>4</b> )                                                                                           | 10                  |
| Figure S2: $^{125}Te$ NMR spectrum of compound <b>5</b>                                                                                                            | 10                  |
| Computational details                                                                                                                                              | 11                  |
| Coordinates of the optimized geometries for compounds <b>2</b> , <b>3</b> , <b>I</b> , <b>II</b> , <b>A-E</b> , $Se_8$ , $S_8$ , $(Me_3SiS)_2$ , and $(Me_3Si)_2S$ | 11                  |
| References                                                                                                                                                         | 41                  |

## Experimental procedures

All the air and moisture sensitive compounds were manipulated under a dry N<sub>2</sub> atmosphere using either glovebox [Jacomax (GP Concept)-T2 workstation] or standard Schlenk techniques. All the solvents were dried prior to use. Hexane, THF, toluene, and C<sub>6</sub>D<sub>6</sub> were dried over potassium. CDCl<sub>3</sub>, DMSO-d<sub>6</sub>, and acetonitrile were dried over 4 Å molecular sieves and P<sub>2</sub>O<sub>5</sub>, respectively. Elemental selenium, sulfur, and tellurium were purchased from Aldrich and used as such. Compound **1** and lithium trimethylsilyl thiolate-tetrahydrofuran adduct (1:0.82) (LiSSiMe<sub>3</sub>·thf) were prepared according to the literature procedures.<sup>S1,S2</sup> Melting points were recorded using an Ambassador melting point apparatus by sealing the samples in glass capillaries. Elemental analyses were performed on a Perkin-Elmer CHN analyzer. The <sup>1</sup>H, <sup>13</sup>C, <sup>29</sup>Si, <sup>77</sup>Se, and <sup>125</sup>Te NMR spectra were recorded on a 300 MHz Bruker DPX-300 spectrometer. The chemical shifts  $\delta$  are reported in ppm and referenced internally with respect to the residual solvent (<sup>1</sup>H NMR) and solvent (<sup>13</sup>C NMR) resonances.<sup>S3</sup> In the <sup>29</sup>Si, <sup>77</sup>Se, and <sup>125</sup>Te NMR spectroscopic studies, tetramethylsilane (TMS), dimethylselenide (Me<sub>2</sub>Se), and dimethyltelluride (Me<sub>2</sub>Te) were used as external references, respectively.

**Synthesis of (Bu<sup>i</sup><sub>2</sub>ATI)GeSSiMe<sub>3</sub> (2).** To a suspension of compound **1** (2.00 g, 5.89 mmol) in hexane (80 ml), a solution of lithium trimethylsilyl thiolate-tetrahydrofuran (1:0.82) adduct (1.01 g, 5.89 mmol) in hexane (10 ml) was added at 0 °C, allowed to come to room temperature, and stirred for 8 h. The resulting red solution was filtered through a G4 sintered funnel with celite. Removal of all the volatiles from the filtrate under reduced pressure afforded an analytically pure sample of compound **2** as a red solid. Yield: 2.36 g (5.77 mmol, 98%). Mp: 94 °C. Anal. Calcd for C<sub>18</sub>H<sub>32</sub>GeN<sub>2</sub>SSi (*M* = 409.25): C, 52.8; H, 7.9; N, 6.9. Found: C, 52.7; H, 7.9; N, 6.8. <sup>1</sup>H NMR (300 MHz, C<sub>6</sub>D<sub>6</sub>): δ 0.63 (s, 9H, Si(CH<sub>3</sub>)<sub>3</sub>), 0.83 (d, <sup>3</sup>J<sub>HH</sub> = 6.6 Hz, 6H, CH(CH<sub>3</sub>)<sub>2</sub>), 0.93 (d, <sup>3</sup>J<sub>HH</sub> = 6.6 Hz, 6H, CH(CH<sub>3</sub>)<sub>2</sub>), 2.09-2.22 (m, 2H, CH(CH<sub>3</sub>)<sub>2</sub>), 3.17 (dd, J<sub>HH</sub> = 13.8, 6.3 Hz, 2H, CH<sub>2</sub>), 3.41 (dd, J<sub>HH</sub> = 13.8, 8.1 Hz, 2H, CH<sub>2</sub>), 6.09-6.15 (m, 1H, CH<sub>ring</sub>), 6.26 (d, J<sub>HH</sub> = 11.4 Hz, 2H, CH<sub>ring</sub>), 6.59-6.66 (m, 2H, CH<sub>ring</sub>). <sup>13</sup>C{<sup>1</sup>H} NMR (75 MHz, C<sub>6</sub>D<sub>6</sub>): δ 5.35 (Si(CH<sub>3</sub>)<sub>3</sub>), 21.07 (CH(CH<sub>3</sub>)<sub>2</sub>), 21.32 (CH(CH<sub>3</sub>)<sub>2</sub>), 28.03 (CH(CH<sub>3</sub>)<sub>2</sub>), 54.13 (CH<sub>2</sub>), 115.41, 120.50, 136.72, 161.54 (CH<sub>ring</sub>). <sup>29</sup>Si{<sup>1</sup>H} NMR (60 MHz, C<sub>6</sub>D<sub>6</sub>): δ 10.16 (S-Si(CH<sub>3</sub>)<sub>3</sub>).

**Synthesis of {(Bu<sup>i</sup><sub>2</sub>ATI)Ge(Se)}<sub>2</sub>Se (3).** To a solution of compound **2** (1.00 g, 2.44 mmol) in tetrahydrofuran (20 ml), elemental selenium (0.29 g, 3.67 mmol) was added at room temperature and stirred for 12 h. The resulting yellow solution was filtered through a G4 sintered funnel with celite. Removal of all the volatiles under reduced pressure led to the formation of a yellow paste. This was washed twice with cold hexane (5 ml) and dried under vacuum to get an analytically pure sample of compound **3** as a yellow solid. Slow cooling of a hot solution of compound **3** in acetonitrile to room temperature afforded single crystals suitable for X-ray diffraction studies. Yield: 0.99 g, (1.17 mmol, 95.8%). Mp: 198 °C (decomp). Anal. Calcd for C<sub>30</sub>H<sub>46</sub>Ge<sub>2</sub>N<sub>4</sub>Se<sub>3</sub> (*M* = 844.87): C, 42.7; H, 5.5; N, 6.6. Found: C, 42.6; H, 5.5; N, 6.7. <sup>1</sup>H NMR (300 MHz, (CD<sub>3</sub>)<sub>2</sub>SO): δ 0.98 (d, <sup>3</sup>J<sub>HH</sub> = 5.7 Hz, 24H, CH(CH<sub>3</sub>)<sub>2</sub>), 2.33-2.43 (m, 4H, CH(CH<sub>3</sub>)<sub>2</sub>), 3.52-3.76 (m, 8H, CH<sub>2</sub>), 6.97-7.05 (m, 2H, CH<sub>ring</sub>), 7.24-7.30 (m, 4H, CH<sub>ring</sub>), 7.53-7.60 (m, 4H, CH<sub>ring</sub>). <sup>13</sup>C{<sup>1</sup>H} NMR (75 MHz, (CD<sub>3</sub>)<sub>2</sub>SO): δ 20.70 (CH(CH<sub>3</sub>)<sub>2</sub>), 27.33 (CH(CH<sub>3</sub>)<sub>2</sub>), 51.90 (CH<sub>2</sub>), 117.79, 126.28, 138.59, 156.49 (Ring). <sup>77</sup>Se{<sup>1</sup>H} NMR (57 MHz, (CD<sub>3</sub>)<sub>2</sub>SO): δ -370.42, -324.06 (Ge=Se, Ge-Se-Ge).

**Synthesis of  $\{(Bu^i_2ATI)Ge(S)\}_2S$  (4).** To a solution of compound **2** (1.00 g, 2.44 mmol) in tetrahydrofuran (20 mL), elemental sulfur (0.08 g, 2.49 mmol) was added at room temperature and stirred for 6 h. Removal of all the volatiles from the resulting yellow solution under reduced pressure led to the formation of a yellow solid. This solid was washed twice with cold hexane (5 mL) and dried to get an analytically pure sample of compound **4** as a yellow solid. Cooling a hot solution of compound **4** in acetonitrile to room temperature slowly afforded single crystals suitable for X-ray diffraction studies. Yield: 0.84 g, (1.19 mmol, 97.7%). Mp: 181 °C (decomp). Anal. Calcd for  $C_{30}H_{46}Ge_2N_4S_3$  ( $M = 704.19$ ): C, 51.2; H, 6.5; N, 8.0. Found: C, 51.2; H, 6.6; N, 7.9.  $^1H$  NMR (300 MHz,  $C_6D_6$ ):  $\delta$  1.02 (d,  $^3J_{HH} = 6.6$  Hz, 24H,  $CH(CH_3)_2$ ), 2.50-2.64 (m, 4H,  $CH(CH_3)_2$ ), 3.80 (d,  $^3J_{HH} = 7.2$  Hz, 8H,  $CH_2$ ), 6.18-6.25 (m, 2H,  $CH_{ring}$ ), 6.54 (d,  $^3J_{HH} = 11.1$  Hz, 4H,  $CH_{ring}$ ), 6.64-6.71 (m, 4H,  $CH_{ring}$ ).  $^{13}C\{^1H\}$  NMR (75 MHz,  $C_6D_6$ ):  $\delta$  21.24 ( $CH(CH_3)_2$ ), 28.25 ( $CH(CH_3)_2$ ), 53.46 ( $CH_2$ ), 116.49, 124.11, 137.72, 157.48 ( $CH_{ring}$ ).

**Synthesis of  $\{(Bu^i_2ATI)Ge(Te)\}_2Te$  (5).** To a solution of compound **2** (70 mg, 0.17 mmol) in DMSO- $d_6$  (1 mL), elemental tellurium (37 mg, 0.29 mmol) was added at room temperature and stirred for 12 h. After that, with no color change being observed, the red reaction mixture (with trace amount of tellurium particles) was analyzed by NMR spectroscopic studies that revealed the quantitative formation of compound **5**. The reaction was performed also in tetrahydrofuran as a solvent that afforded the same product quantitatively as in DMSO- $d_6$ .  $^{125}Te\{^1H\}$  NMR (94.62 MHz,  $(CD_3)_2SO$ ):  $\delta$  -933.2, -217.9 (Ge=Te, Ge-Te-Ge).

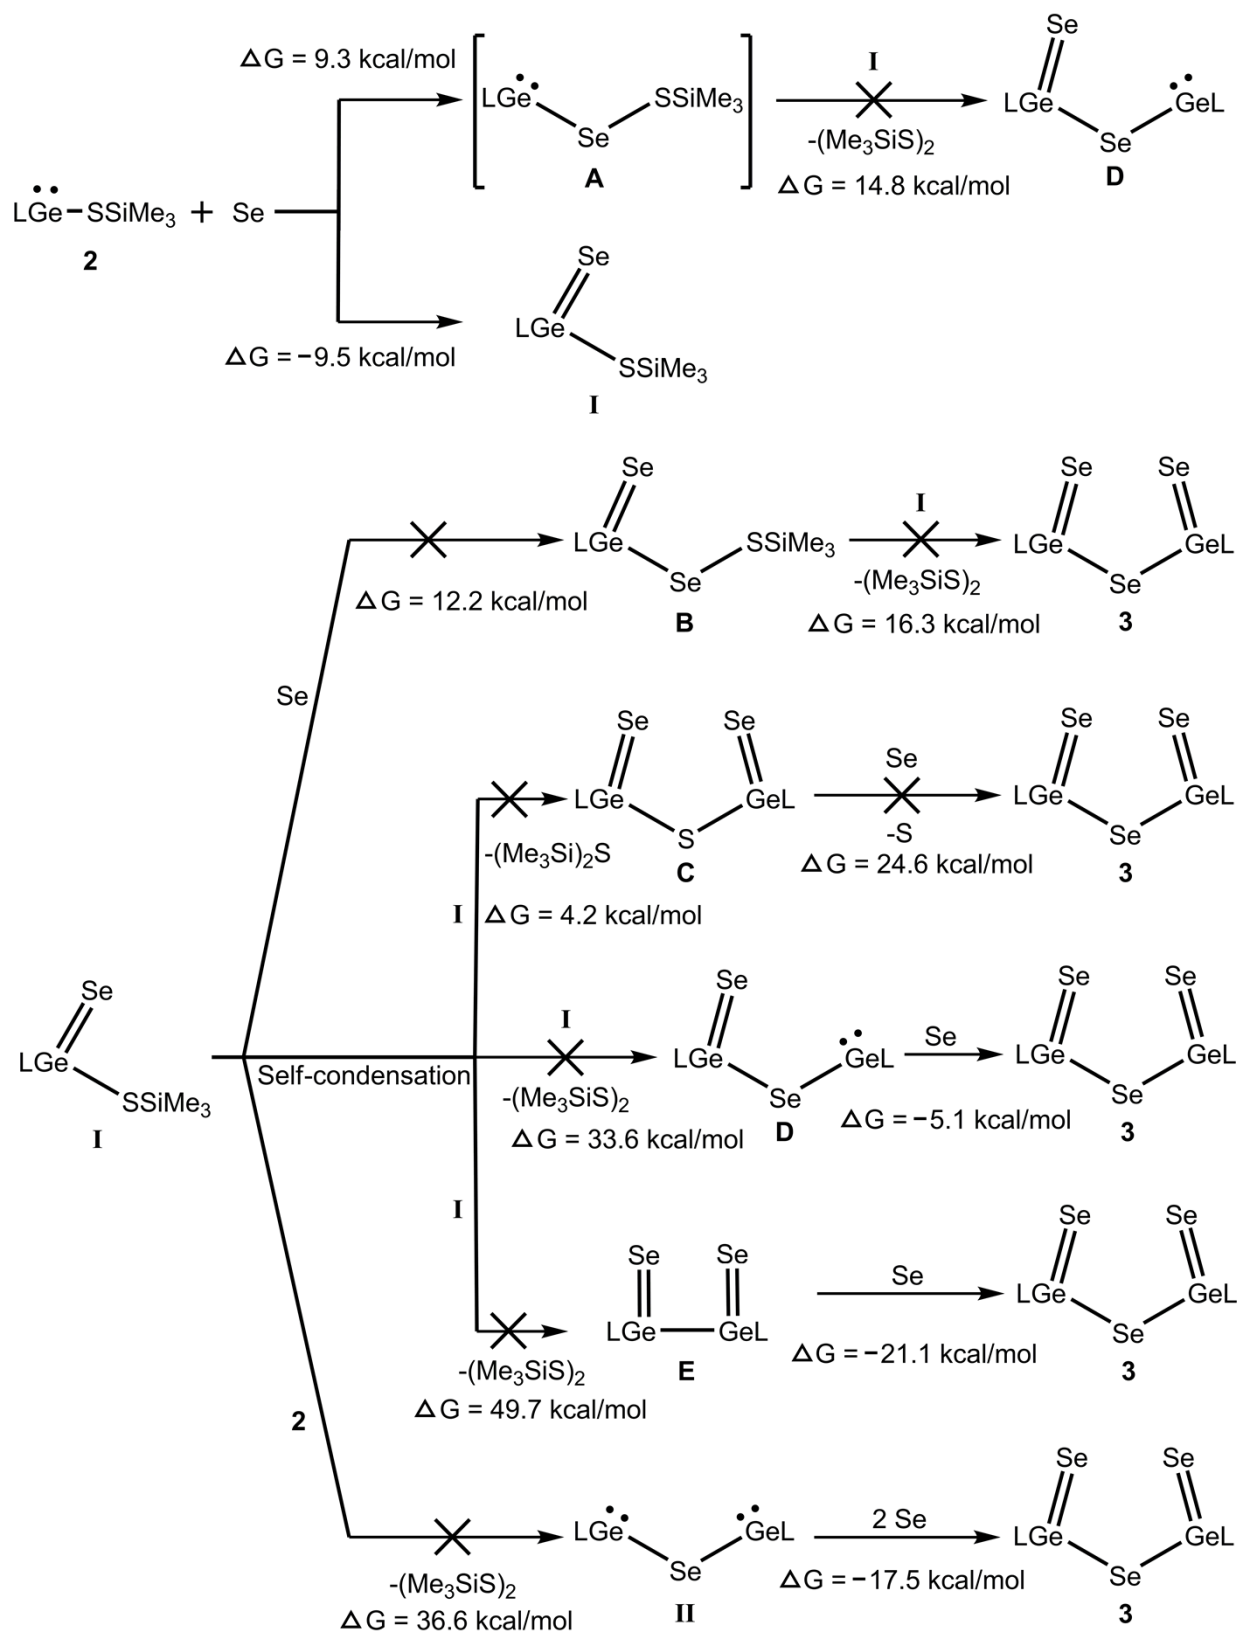

**Scheme S1.** Various reaction pathways and their thermochemical feasibility for the formation of compound **3** from compound **2** and elemental selenium.

**Table S1.** Thermochemical variables for reactants, products, and reaction steps shown in scheme S1

| S. No. | Variable            | Reactant (Hartree/particle)                   | Product (Hartree/particle)                                    | Reaction (kcal/mol) |
|--------|---------------------|-----------------------------------------------|---------------------------------------------------------------|---------------------|
| 1.     | E+H <sub>corr</sub> | <b>2</b> + 1/8Se <sub>8</sub> = -5980.7696085 | <b>A</b> = -5980.755986                                       | ΔH = 8.5            |
|        | E+G <sub>corr</sub> | -5980.87216375                                | -5980.857335                                                  | ΔG = 9.3            |
| 2.     | E+H <sub>corr</sub> | <b>2</b> +1/8Se <sub>8</sub> = -5980.7696085  | <b>I</b> = -5980.789785                                       | ΔH = -12.7          |
|        | E+G <sub>corr</sub> | -5980.87216375                                | -5980.887354                                                  | ΔG = -9.5           |
| 3.     | E+H <sub>corr</sub> | <b>I</b> + <b>A</b> = -11961.545771           | <b>D</b> +(Me <sub>3</sub> SiS) <sub>2</sub> = -11961.522431  | ΔH = 14.6           |
|        | E+G <sub>corr</sub> | -11961.744689                                 | -11961.72111                                                  | ΔG = 14.8           |
| 4.     | E+H <sub>corr</sub> | <b>A</b> + <b>A</b> = - 11961.511972          | <b>D</b> +(Me <sub>3</sub> SiS) <sub>2</sub> = - 11961.522431 | ΔH = -6.6           |
|        | E+G <sub>corr</sub> | -11961.71467                                  | -11961.72111                                                  | ΔG = -4.0           |
| 5      | E+H <sub>corr</sub> | <b>A</b> + <b>A</b> = - 11961.511972          | <b>E</b> +(Me <sub>3</sub> SiS) <sub>2</sub> = - 11961.499701 | ΔH = 7.7            |
|        | E+G <sub>corr</sub> | -11961.71467                                  | -11961.695548                                                 | ΔG = 12.0           |
| 6      | E+H <sub>corr</sub> | <b>A</b> + <b>2</b> = - 9559.871855           | <b>II</b> +(Me <sub>3</sub> SiS) <sub>2</sub> = - 9559.844547 | ΔH = 17.1           |
|        | E+G <sub>corr</sub> | -9560.067829                                  | -9560.039583                                                  | ΔG= 17.7            |
| 7      | E+H <sub>corr</sub> | <b>A</b> + <b>B</b> = - 14363.179968          | <b>3</b> +(Me <sub>3</sub> SiS) <sub>2</sub> = - 14363.188829 | ΔH = -5.6           |
|        | E+G <sub>corr</sub> | -14363.38684                                  | -14363.390882                                                 | ΔG= -2.5            |
| 8      | E+H <sub>corr</sub> | <b>A</b> +1/8Se <sub>8</sub> = -8382.4097255  | <b>B</b> = -8382.423982                                       | ΔH = -8.9           |
|        | E+G <sub>corr</sub> | -8382.51900475                                | -8382.529505                                                  | ΔG= -6.6            |
| 9      | E+H <sub>corr</sub> | <b>I</b> +1/8Se <sub>8</sub> = -8382.4435245  | <b>B</b> = -8382.423982                                       | ΔH = 12.3           |
|        | E+G <sub>corr</sub> | -8382.54902375                                | -8382.529505                                                  | ΔG= 12.2            |
| 10     | E+H <sub>corr</sub> | <b>I</b> + <b>B</b> = -14363.213767           | <b>3</b> +(Me <sub>3</sub> SiS) <sub>2</sub> = - 14363.188829 | ΔH = 15.6           |
|        | E+G <sub>corr</sub> | -14363.416859                                 | -14363.390882                                                 | ΔG= 16.3            |
| 11     | E+H <sub>corr</sub> | <b>I</b> + <b>2</b> = -9559.905654            | <b>II</b> +(Me <sub>3</sub> SiS) <sub>2</sub> = - 9559.844547 | ΔH = 38.3           |
|        | E+G <sub>corr</sub> | -9560.097848                                  | -9560.039583                                                  | ΔG= 36.6            |
| 12     | E+H <sub>corr</sub> | <b>I</b> + <b>I</b> = -11961.57957            | <b>D</b> +(Me <sub>3</sub> SiS) <sub>2</sub> = - 11961.522431 | ΔH = 35.9           |

|    |                     |                                             |                                                           |            |
|----|---------------------|---------------------------------------------|-----------------------------------------------------------|------------|
|    | E+G <sub>corr</sub> | -11961.774708                               | -11961.72111                                              | ΔG= 33.6   |
| 13 | E+H <sub>corr</sub> | <b>I+I</b> = -11961.57957                   | <b>E+(Me<sub>3</sub>SiS)<sub>2</sub></b> = - 11961.499701 | ΔH = 50.1  |
|    | E+G <sub>corr</sub> | -11961.774708                               | -11961.695548                                             | ΔG= 49.7   |
| 14 | E+H <sub>corr</sub> | <b>I+I</b> = -11961.57957                   | <b>C+(Me<sub>3</sub>Si)<sub>2</sub>S</b> = -11961.571809  | ΔH = 4.9   |
|    | E+G <sub>corr</sub> | -11961.774708                               | -11961.768079                                             | ΔG= 4.2    |
| 15 | E+H <sub>corr</sub> | <b>D+1/8Se<sub>8</sub></b> = -12748.4312085 | <b>3</b> = -12748.443867                                  | ΔH = -7.9  |
|    | E+G <sub>corr</sub> | -12748.56972575                             | -12748.577828                                             | ΔG= -5.1   |
| 16 | E+H <sub>corr</sub> | <b>C+1/8Se<sub>8</sub></b> = -13146.6681235 | <b>3+1/8S<sub>8</sub></b> = -13146.630218125              | ΔH = 23.8  |
|    | E+G <sub>corr</sub> | -13146.80973475                             | -13146.770553625                                          | ΔG= 24.6   |
| 17 | E+H <sub>corr</sub> | <b>E+1/8Se<sub>8</sub></b> = -12748.4084785 | <b>3</b> = -12748.443867                                  | ΔH = -22.2 |
|    | E+G <sub>corr</sub> | -12748.54416375                             | -12748.577828                                             | ΔG= -21.1  |
| 18 | E+H <sub>corr</sub> | <b>II+1/4Se<sub>8</sub></b> = -12748.407064 | <b>3</b> = -12748.443867                                  | ΔH = -23.1 |
|    | E+G <sub>corr</sub> | -12748.5498685                              | -12748.577828                                             | ΔG= -17.5  |

**X-ray data collection for compounds 3 and 4.** Suitable single crystals of compounds **3** and **4** were coated with a cryoprotectant and mounted on a glass fiber. The data were collected at low temperature on a Bruker SMART APEX CCD diffractometer with a 3-axis goniometer.<sup>S4</sup> SAINT and SADABS software were used for data integration and empirical absorption correction, respectively.<sup>S5</sup> The structure of these compounds were solved by patterson methods and refined by full matrix least-squares on  $F^2$  using SHELXTL.<sup>S6</sup> All the non-hydrogen atoms were refined anisotropically. The positions of hydrogen atoms were calculated using a riding model and refined isotropically. Detailed crystallographic data for these compounds are given in Table S1.



**Table S2. Crystal data and refinement parameters for compounds 3 and 4**

|                                               | <b>3</b>                                                                       | <b>4</b>                                                                      |
|-----------------------------------------------|--------------------------------------------------------------------------------|-------------------------------------------------------------------------------|
| empirical formula                             | C <sub>30</sub> H <sub>46</sub> Ge <sub>2</sub> N <sub>4</sub> Se <sub>3</sub> | C <sub>30</sub> H <sub>46</sub> Ge <sub>2</sub> N <sub>4</sub> S <sub>3</sub> |
| fw                                            | 844.81                                                                         | 704.14                                                                        |
| temperature, k                                | 100(2)                                                                         | 150(2)                                                                        |
| wavelength, Å                                 | 0.71073                                                                        | 0.71073                                                                       |
| cryst syst                                    | monoclinic                                                                     | monoclinic                                                                    |
| space group                                   | <i>P</i> 2 <sub>1</sub> / <i>c</i>                                             | <i>P</i> 2 <sub>1</sub> / <i>c</i>                                            |
| unit cell dimens                              | <i>a</i> = 16.736(3) Å                                                         | <i>a</i> = 16.400(4) Å                                                        |
|                                               | <i>b</i> = 11.336(2) Å                                                         | <i>b</i> = 11.364(3) Å                                                        |
|                                               | <i>c</i> = 18.978(3) Å                                                         | <i>c</i> = 18.733(5) Å                                                        |
|                                               | $\beta$ = 106.354(3)°                                                          | $\beta$ = 106.005(4)°                                                         |
| volume, Å <sup>3</sup>                        | 3454.8(10)                                                                     | 3355.9(15)                                                                    |
| <i>Z</i>                                      | 4                                                                              | 4                                                                             |
| density (calcd), Mg/m <sup>3</sup>            | 1.565                                                                          | 1.394                                                                         |
| absorption coefficient, mm <sup>-1</sup>      | 4.511                                                                          | 2.003                                                                         |
| <i>F</i> (000)                                | 1626.6                                                                         | 1464.0                                                                        |
| cryst size, mm <sup>3</sup>                   | 0.461 x 0.387 x 0.266                                                          | 0.474 x 0.339 x 0.255                                                         |
| $\theta$ range for data collection, deg       | 1.27 to 25.00                                                                  | 1.29 to 25.00                                                                 |
| limiting indices                              | -10 ≤ <i>h</i> ≤ 19,                                                           | -19 ≤ <i>h</i> ≤ 19,                                                          |
|                                               | -13 ≤ <i>k</i> ≤ 13,                                                           | -13 ≤ <i>k</i> ≤ 13,                                                          |
|                                               | -22 ≤ <i>l</i> ≤ 22                                                            | -22 ≤ <i>l</i> ≤ 22                                                           |
| no. of reflns collected                       | 17739                                                                          | 17191                                                                         |
| no. of indep reflns                           | 6084 ( <i>R</i> <sub>int</sub> = 0.0461)                                       | 5904 ( <i>R</i> <sub>int</sub> = 0.0503)                                      |
| abs corr                                      | semiempirical                                                                  | semiempirical                                                                 |
| refinement method                             | full-matrix                                                                    | full-matrix                                                                   |
|                                               | least-squares on <i>F</i> <sup>2</sup>                                         | least-squares on <i>F</i> <sup>2</sup>                                        |
| no. of data / restraints / params             | 6068 / 0 / 361                                                                 | 5903 / 0 / 360                                                                |
| goodness-of-fit on <i>F</i> <sup>2</sup>      | 1.066                                                                          | 1.025                                                                         |
| final R indices [ <i>I</i> > 2σ( <i>I</i> )]  | <i>R</i> <sub>1</sub> = 0.0419, <i>wR</i> <sub>2</sub> = 0.1169                | <i>R</i> <sub>1</sub> = 0.0426, <i>wR</i> <sub>2</sub> = 0.0921               |
| R indices (all data)                          | <i>R</i> <sub>1</sub> = 0.0545, <i>wR</i> <sub>2</sub> = 0.1329                | <i>R</i> <sub>1</sub> = 0.0599, <i>wR</i> <sub>2</sub> = 0.0981               |
| largest diff peak and hole, e Å <sup>-3</sup> | 0.973 and -0.763                                                               | 0.774 and -0.359                                                              |

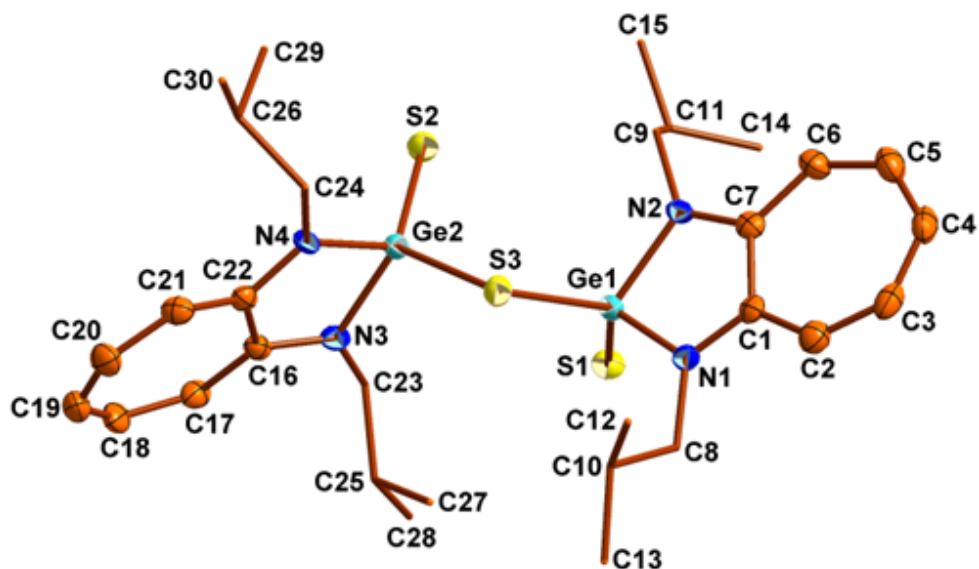

**Figure S1.** Molecular structure of  $\{(Bu^i_2ATI)Ge(S)\}_2S$  (**4**). All the hydrogen atoms and thermal ellipsoids of isobutyl groups are omitted for clarity. Thermal ellipsoids are drawn at 50% probability. Selected bond lengths (Å) and angles (°): Ge(1)-S(1) 2.082(1), Ge(2)-S(2) 2.077(1), Ge(1)-S(3) 2.219(1), Ge(2)-S(3) 2.221(1), Ge(1)-N(1) 1.896(3), Ge(1)-N(2) 1.886(3), Ge(2)-N(3) 1.894(3), Ge(2)-N(4) 1.895(3); S(1)-Ge(1)-S(3) 123.4(1), S(2)-Ge(2)-S(3) 118.3(1), Ge(1)-S(3)-Ge(2) 105.7(1), N(1)-Ge(1)-N(2) 84.2(1), N(3)-Ge(2)-N(4) 84.2(1).

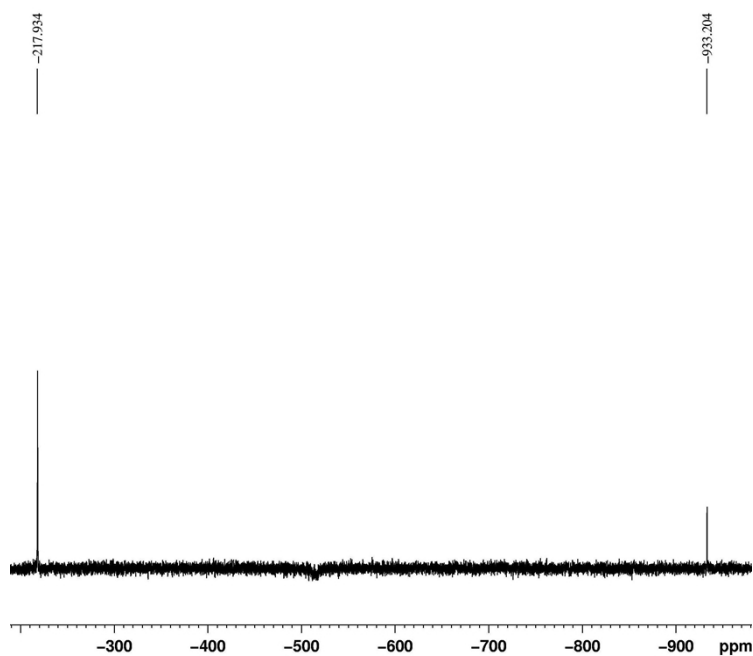

**Figure S2:**  $^{125}Te$  NMR Spectrum of compound **5**

**Computational details.** GAUSSIAN-09 programs<sup>S7</sup> were used for doing all the computational work. The geometry optimizations of all the compounds (input coordinates taken from Single-crystal diffraction studies) and model compounds were done using basis sets cc-PVQZ for germanium and selenium, and TZV for rest of the elements at the B3LYP level of theory. The thermochemical variables for S and Se atoms were taken as 1/8 of those of S<sub>8</sub> and Se<sub>8</sub> (The grey selenium used in the reaction has a polymeric structure and is the most dense form of elemental selenium. As this form cannot be used for calculations, among the discrete forms of elemental selenium that is most dense (Se<sub>8</sub> ring) is used in calculations.<sup>S8</sup> Further, this approach gives uniformity with S<sub>8</sub> which has to be used for elemental sulfur), respectively.

**Coordinates of the optimized geometry of compound I**

|   |              |              |              |
|---|--------------|--------------|--------------|
| 6 | 3.370395000  | -1.275661000 | -1.196751000 |
| 6 | 4.687717000  | -0.890754000 | -1.402999000 |
| 6 | 5.346657000  | 0.282281000  | -1.043606000 |
| 6 | 4.775675000  | 1.371598000  | -0.396901000 |
| 6 | 3.458597000  | 1.590792000  | -0.006831000 |
| 6 | 2.298455000  | 0.795812000  | -0.119921000 |
| 6 | 2.273257000  | -0.608103000 | -0.608333000 |
| 7 | 1.068693000  | -1.198737000 | -0.456117000 |
| 7 | 1.089152000  | 1.243110000  | 0.293335000  |
| 6 | 0.902115000  | 2.546856000  | 0.966305000  |
| 1 | -0.050511000 | 2.489743000  | 1.496202000  |
| 1 | 1.669303000  | 2.658167000  | 1.738438000  |
| 6 | 0.727030000  | -2.579348000 | -0.856565000 |
| 1 | -0.282960000 | -2.534416000 | -1.269258000 |

|    |              |              |              |
|----|--------------|--------------|--------------|
| 1  | 1.372753000  | -2.919150000 | -1.668158000 |
| 6  | 0.901655000  | 3.795030000  | 0.047090000  |
| 1  | 1.769416000  | 3.739183000  | -0.617127000 |
| 6  | 1.046464000  | 5.055573000  | 0.919264000  |
| 1  | 1.974653000  | 5.045790000  | 1.495925000  |
| 1  | 1.045566000  | 5.954068000  | 0.299972000  |
| 1  | 0.215160000  | 5.137880000  | 1.624405000  |
| 6  | -0.357112000 | 3.873834000  | -0.829462000 |
| 1  | -0.483311000 | 2.982352000  | -1.441760000 |
| 1  | -1.251838000 | 3.980400000  | -0.209970000 |
| 1  | -0.305672000 | 4.739682000  | -1.493225000 |
| 6  | 0.740704000  | -3.607661000 | 0.301829000  |
| 1  | 0.076969000  | -3.220764000 | 1.079651000  |
| 6  | 2.133211000  | -3.805489000 | 0.919247000  |
| 1  | 2.836172000  | -4.221089000 | 0.191077000  |
| 1  | 2.543130000  | -2.869160000 | 1.298797000  |
| 1  | 2.076826000  | -4.501913000 | 1.757990000  |
| 6  | 0.165711000  | -4.940207000 | -0.210078000 |
| 1  | 0.788418000  | -5.359970000 | -1.005754000 |
| 1  | 0.121584000  | -5.672468000 | 0.597631000  |
| 1  | -0.845647000 | -4.814840000 | -0.602084000 |
| 32 | -0.313042000 | -0.076832000 | 0.282371000  |
| 16 | -1.560232000 | 0.264163000  | -1.574492000 |
| 14 | -3.775106000 | 0.123981000  | -0.975856000 |
| 6  | -4.198420000 | 1.469953000  | 0.291118000  |

|    |              |              |              |
|----|--------------|--------------|--------------|
| 1  | -3.639561000 | 1.315889000  | 1.213164000  |
| 1  | -3.961584000 | 2.459125000  | -0.101219000 |
| 1  | -5.265552000 | 1.441908000  | 0.525664000  |
| 6  | -4.635455000 | 0.451642000  | -2.641126000 |
| 1  | -4.347878000 | -0.292347000 | -3.384256000 |
| 1  | -5.720412000 | 0.408606000  | -2.519319000 |
| 1  | -4.376523000 | 1.436323000  | -3.030643000 |
| 6  | -4.156916000 | -1.622217000 | -0.342194000 |
| 1  | -3.915078000 | -2.368847000 | -1.099194000 |
| 1  | -3.580403000 | -1.835212000 | 0.556968000  |
| 1  | -5.219010000 | -1.711989000 | -0.100648000 |
| 1  | 3.150120000  | -2.276268000 | -1.534525000 |
| 1  | 5.297963000  | -1.635205000 | -1.902720000 |
| 1  | 6.400091000  | 0.347269000  | -1.282527000 |
| 1  | 5.450859000  | 2.189717000  | -0.170968000 |
| 1  | 3.294562000  | 2.552117000  | 0.454396000  |
| 34 | -1.205542000 | -0.525955000 | 2.274118000  |

**Coordinates of the optimized geometry of compound A**

|   |              |              |              |
|---|--------------|--------------|--------------|
| 6 | -3.711637000 | 1.351899000  | -0.919032000 |
| 6 | -5.031673000 | 0.990086000  | -1.131728000 |
| 6 | -5.724653000 | -0.159087000 | -0.747255000 |
| 6 | -5.182991000 | -1.248243000 | -0.076961000 |
| 6 | -3.870582000 | -1.496482000 | 0.315295000  |
| 6 | -2.692660000 | -0.723398000 | 0.203581000  |

|   |              |              |              |
|---|--------------|--------------|--------------|
| 6 | -2.640231000 | 0.681856000  | -0.271746000 |
| 7 | -1.443947000 | 1.257733000  | -0.056921000 |
| 7 | -1.488190000 | -1.182980000 | 0.619633000  |
| 6 | -1.301311000 | -2.541807000 | 1.168731000  |
| 1 | -0.309566000 | -2.558190000 | 1.627564000  |
| 1 | -2.018066000 | -2.716498000 | 1.979587000  |
| 6 | -1.070536000 | 2.628932000  | -0.453983000 |
| 1 | -0.062349000 | 2.566916000  | -0.869373000 |
| 1 | -1.709077000 | 3.000806000  | -1.256610000 |
| 6 | -1.384158000 | -3.717284000 | 0.160806000  |
| 1 | -2.373413000 | -3.708749000 | -0.304811000 |
| 6 | -1.236500000 | -5.040104000 | 0.934864000  |
| 1 | -2.000042000 | -5.142732000 | 1.709816000  |
| 1 | -1.327568000 | -5.893161000 | 0.260522000  |
| 1 | -0.257339000 | -5.101937000 | 1.417421000  |
| 6 | -0.340419000 | -3.612160000 | -0.959366000 |
| 1 | -0.467540000 | -2.701031000 | -1.543661000 |
| 1 | 0.674363000  | -3.609026000 | -0.555697000 |
| 1 | -0.428942000 | -4.460400000 | -1.641644000 |
| 6 | -1.060066000 | 3.642825000  | 0.716103000  |
| 1 | -0.413640000 | 3.226456000  | 1.495863000  |
| 6 | -2.454221000 | 3.871165000  | 1.319971000  |
| 1 | -3.129047000 | 4.324804000  | 0.588677000  |
| 1 | -2.903202000 | 2.938298000  | 1.662942000  |
| 1 | -2.393050000 | 4.546013000  | 2.176204000  |

|    |              |              |              |
|----|--------------|--------------|--------------|
| 6  | -0.436200000 | 4.964523000  | 0.235141000  |
| 1  | -1.035691000 | 5.413890000  | -0.561766000 |
| 1  | -0.380508000 | 5.684259000  | 1.053692000  |
| 1  | 0.574435000  | 4.810548000  | -0.147184000 |
| 32 | -0.052638000 | 0.158191000  | 0.844032000  |
| 1  | -3.459803000 | 2.332609000  | -1.292477000 |
| 1  | -5.619195000 | 1.731340000  | -1.663276000 |
| 1  | -6.778079000 | -0.202619000 | -0.991318000 |
| 1  | -5.879819000 | -2.044135000 | 0.164106000  |
| 1  | -3.731206000 | -2.453857000 | 0.793608000  |
| 14 | 4.636728000  | -0.105211000 | 0.190704000  |
| 16 | 2.971554000  | 1.222162000  | -0.649851000 |
| 34 | 1.358818000  | -0.290972000 | -1.220578000 |
| 6  | 6.003176000  | 1.143015000  | 0.635963000  |
| 1  | 5.655736000  | 1.853851000  | 1.386082000  |
| 1  | 6.876210000  | 0.624941000  | 1.039580000  |
| 1  | 6.320647000  | 1.705357000  | -0.242474000 |
| 6  | 4.016026000  | -1.029091000 | 1.729304000  |
| 1  | 3.677892000  | -0.327544000 | 2.491543000  |
| 1  | 3.180824000  | -1.681656000 | 1.476575000  |
| 1  | 4.813798000  | -1.643666000 | 2.153554000  |
| 6  | 5.202767000  | -1.310736000 | -1.162289000 |
| 1  | 4.363665000  | -1.907577000 | -1.519651000 |
| 1  | 5.616172000  | -0.767206000 | -2.011863000 |
| 1  | 5.969107000  | -1.989495000 | -0.780534000 |

### Coordinates of the optimized geometry of compound B

|   |             |              |              |
|---|-------------|--------------|--------------|
| 6 | 3.856382000 | -1.137408000 | -1.228882000 |
| 6 | 5.150305000 | -0.699253000 | -1.464125000 |
| 6 | 5.781743000 | 0.483612000  | -1.081105000 |
| 6 | 5.196588000 | 1.528150000  | -0.378781000 |
| 6 | 3.881775000 | 1.692207000  | 0.049901000  |
| 6 | 2.745852000 | 0.867238000  | -0.068035000 |
| 6 | 2.756202000 | -0.526770000 | -0.582351000 |
| 7 | 1.581744000 | -1.165038000 | -0.403601000 |
| 7 | 1.525688000 | 1.269096000  | 0.369998000  |
| 6 | 1.298731000 | 2.555731000  | 1.064705000  |
| 1 | 0.337709000 | 2.464256000  | 1.574446000  |
| 1 | 2.047442000 | 2.670273000  | 1.854863000  |
| 6 | 1.271802000 | -2.546423000 | -0.830417000 |
| 1 | 0.246298000 | -2.528611000 | -1.205491000 |
| 1 | 1.899211000 | -2.840854000 | -1.673584000 |
| 6 | 1.281364000 | 3.830129000  | 0.183924000  |
| 1 | 2.237201000 | 3.910274000  | -0.342020000 |
| 6 | 1.143059000 | 5.056558000  | 1.104804000  |
| 1 | 1.955059000 | 5.107538000  | 1.833841000  |
| 1 | 1.157305000 | 5.979009000  | 0.522116000  |
| 1 | 0.199587000 | 5.025118000  | 1.655627000  |
| 6 | 0.168604000 | 3.807626000  | -0.873402000 |
| 1 | 0.285528000 | 2.975896000  | -1.568140000 |



|    |              |              |              |
|----|--------------|--------------|--------------|
| 1  | -0.814898000 | 3.717006000  | -0.407011000 |
| 1  | 0.180467000  | 4.730895000  | -1.456480000 |
| 6  | 1.360599000  | -3.605331000 | 0.296083000  |
| 1  | 0.712919000  | -3.263040000 | 1.107242000  |
| 6  | 2.780574000  | -3.773406000 | 0.856924000  |
| 1  | 3.469540000  | -4.146856000 | 0.093264000  |
| 1  | 3.174386000  | -2.834666000 | 1.247914000  |
| 1  | 2.777106000  | -4.493315000 | 1.677500000  |
| 6  | 0.808809000  | -4.940003000 | -0.235161000 |
| 1  | 1.413027000  | -5.315249000 | -1.066660000 |
| 1  | 0.819580000  | -5.696908000 | 0.550697000  |
| 1  | -0.220524000 | -4.835068000 | -0.583194000 |
| 32 | 0.187989000  | -0.115357000 | 0.425024000  |
| 1  | 3.658552000  | -2.134164000 | -1.591313000 |
| 1  | 5.769469000  | -1.403573000 | -2.008917000 |
| 1  | 6.825192000  | 0.591111000  | -1.346900000 |
| 1  | 5.852329000  | 2.357537000  | -0.137308000 |
| 1  | 3.700004000  | 2.629320000  | 0.552349000  |
| 14 | -4.637931000 | 0.166495000  | -0.312701000 |
| 16 | -2.925589000 | -1.148411000 | -1.120295000 |
| 34 | -1.253636000 | 0.333637000  | -1.488379000 |
| 6  | -5.906260000 | -1.138369000 | 0.238611000  |
| 1  | -5.506301000 | -1.748022000 | 1.048528000  |
| 1  | -6.817811000 | -0.653803000 | 0.595915000  |
| 1  | -6.177691000 | -1.800113000 | -0.584360000 |

|    |              |              |              |
|----|--------------|--------------|--------------|
| 6  | -4.036049000 | 1.245164000  | 1.121641000  |
| 1  | -3.475371000 | 0.655577000  | 1.845536000  |
| 1  | -3.382109000 | 2.039900000  | 0.763921000  |
| 1  | -4.889232000 | 1.706471000  | 1.625570000  |
| 6  | -5.290624000 | 1.217971000  | -1.754459000 |
| 1  | -4.505174000 | 1.865533000  | -2.145311000 |
| 1  | -5.642558000 | 0.584644000  | -2.568682000 |
| 1  | -6.119383000 | 1.849910000  | -1.426184000 |
| 34 | -0.590211000 | -0.676693000 | 2.428966000  |

**Coordinates of the optimized geometry of compound C**

|    |              |              |              |
|----|--------------|--------------|--------------|
| 32 | -1.687651000 | -0.628290000 | -0.345188000 |
| 32 | 1.820687000  | 0.599846000  | -0.417106000 |
| 34 | 1.662728000  | 1.699290000  | -2.340755000 |
| 34 | -1.320234000 | -2.051908000 | -2.011366000 |
| 7  | 2.874473000  | -0.994725000 | -0.242857000 |
| 7  | -2.972499000 | 0.762336000  | -0.704029000 |
| 6  | 3.843284000  | -0.935419000 | 0.696827000  |
| 7  | -2.906438000 | -1.074302000 | 1.078774000  |
| 7  | 3.057384000  | 1.296514000  | 0.875964000  |
| 6  | -5.260230000 | 1.419324000  | -0.287118000 |
| 1  | -5.207634000 | 1.930488000  | -1.236421000 |
| 6  | -3.999073000 | -0.281127000 | 1.157769000  |
| 6  | -4.092345000 | 0.696126000  | 0.045089000  |
| 6  | 3.950288000  | 0.396801000  | 1.352998000  |

|   |              |              |              |
|---|--------------|--------------|--------------|
| 6 | 4.665630000  | -2.046520000 | 0.992254000  |
| 1 | 4.455322000  | -2.919892000 | 0.395886000  |
| 6 | 4.889793000  | 0.735845000  | 2.347514000  |
| 1 | 4.802526000  | 1.748373000  | 2.708514000  |
| 6 | -6.116092000 | 0.280363000  | 2.470337000  |
| 1 | -6.572875000 | 0.043127000  | 3.425009000  |
| 6 | -4.894822000 | -0.346364000 | 2.245077000  |
| 1 | -4.579360000 | -1.002147000 | 3.042949000  |
| 6 | -6.850546000 | 1.124626000  | 1.645297000  |
| 1 | -7.819130000 | 1.444668000  | 2.006801000  |
| 6 | -6.458381000 | 1.590895000  | 0.392011000  |
| 1 | -7.185231000 | 2.206015000  | -0.127153000 |
| 6 | 6.276983000  | -1.321001000 | 2.791148000  |
| 1 | 7.093644000  | -1.685613000 | 3.400444000  |
| 6 | 5.705073000  | -2.220609000 | 1.894419000  |
| 1 | 6.140375000  | -3.213990000 | 1.887521000  |
| 6 | 5.894937000  | 0.002384000  | 2.969787000  |
| 1 | 6.456274000  | 0.556667000  | 3.714149000  |
| 6 | 2.546836000  | -2.178422000 | -1.070996000 |
| 1 | 1.459113000  | -2.204743000 | -1.171348000 |
| 1 | 2.832331000  | -3.097330000 | -0.556220000 |
| 6 | 3.070789000  | 2.747536000  | 1.158934000  |
| 1 | 2.874156000  | 3.234858000  | 0.200643000  |
| 1 | 4.068668000  | 3.060875000  | 1.471314000  |
| 6 | -2.811170000 | 1.659350000  | -1.872093000 |

|   |              |              |              |
|---|--------------|--------------|--------------|
| 1 | -3.611934000 | 1.462017000  | -2.592592000 |
| 1 | -1.880442000 | 1.366116000  | -2.359252000 |
| 6 | -2.599129000 | -2.134715000 | 2.061284000  |
| 1 | -2.607044000 | -1.705847000 | 3.068746000  |
| 1 | -1.572138000 | -2.449919000 | 1.871054000  |
| 6 | 3.157131000  | -2.145440000 | -2.494208000 |
| 1 | 2.801008000  | -1.226560000 | -2.967285000 |
| 6 | -2.754214000 | 3.177403000  | -1.563721000 |
| 1 | -3.712614000 | 3.489661000  | -1.138735000 |
| 6 | -3.517534000 | -3.382481000 | 2.020001000  |
| 1 | -4.555820000 | -3.052387000 | 2.117695000  |
| 6 | 2.014951000  | 3.237832000  | 2.178710000  |
| 1 | 1.035245000  | 2.929909000  | 1.803737000  |
| 6 | -1.650354000 | 3.536638000  | -0.558612000 |
| 1 | -0.668505000 | 3.272501000  | -0.954750000 |
| 1 | -1.781287000 | 3.013631000  | 0.389056000  |
| 1 | -1.661524000 | 4.610557000  | -0.357623000 |
| 6 | -2.559524000 | 3.930865000  | -2.893179000 |
| 1 | -1.603962000 | 3.664254000  | -3.349218000 |
| 1 | -2.560921000 | 5.009352000  | -2.725412000 |
| 1 | -3.353546000 | 3.701504000  | -3.608316000 |
| 6 | 2.609120000  | -3.341785000 | -3.291905000 |
| 1 | 2.977590000  | -3.315720000 | -4.319078000 |
| 1 | 1.519091000  | -3.327326000 | -3.323218000 |
| 1 | 2.926403000  | -4.290960000 | -2.848696000 |

|    |              |              |              |
|----|--------------|--------------|--------------|
| 6  | 4.693376000  | -2.125207000 | -2.505779000 |
| 1  | 5.108224000  | -3.044065000 | -2.080699000 |
| 1  | 5.094343000  | -1.276747000 | -1.949569000 |
| 1  | 5.057705000  | -2.044403000 | -3.531879000 |
| 6  | -3.390192000 | -4.159382000 | 0.701812000  |
| 1  | -3.591967000 | -3.530282000 | -0.163974000 |
| 1  | -4.089472000 | -4.998384000 | 0.686848000  |
| 1  | -2.380838000 | -4.558380000 | 0.579049000  |
| 6  | -3.187935000 | -4.278497000 | 3.227904000  |
| 1  | -3.827878000 | -5.162340000 | 3.236598000  |
| 1  | -3.329654000 | -3.752166000 | 4.175219000  |
| 1  | -2.150677000 | -4.621414000 | 3.185402000  |
| 6  | 2.047237000  | 4.775976000  | 2.225306000  |
| 1  | 1.278682000  | 5.155764000  | 2.900696000  |
| 1  | 1.869564000  | 5.208277000  | 1.238816000  |
| 1  | 3.014297000  | 5.139403000  | 2.585061000  |
| 6  | 2.192828000  | 2.634928000  | 3.580489000  |
| 1  | 2.167433000  | 1.545025000  | 3.555914000  |
| 1  | 1.388304000  | 2.968114000  | 4.239176000  |
| 1  | 3.138242000  | 2.950529000  | 4.031441000  |
| 16 | -0.001673000 | 0.214990000  | 0.940632000  |

**Coordinates of the optimized geometry of compound D**

|    |              |              |              |
|----|--------------|--------------|--------------|
| 32 | -1.584320000 | -0.449750000 | -0.378159000 |
| 32 | 1.954788000  | 0.495641000  | -1.014792000 |

|    |              |              |              |
|----|--------------|--------------|--------------|
| 34 | -1.166998000 | -1.813365000 | -2.103117000 |
| 34 | 0.178517000  | 0.505616000  | 0.870728000  |
| 7  | 3.040348000  | -0.992893000 | -0.296373000 |
| 7  | -2.991060000 | 0.830375000  | -0.770805000 |
| 6  | 4.101138000  | -0.676179000 | 0.470550000  |
| 7  | -2.803905000 | -0.968431000 | 1.035365000  |
| 7  | 3.325275000  | 1.507172000  | -0.001866000 |
| 6  | -5.233540000 | 1.527204000  | -0.196549000 |
| 1  | -5.227602000 | 2.066178000  | -1.131613000 |
| 6  | -3.898009000 | -0.188641000 | 1.164592000  |
| 6  | -4.057033000 | 0.784418000  | 0.054502000  |
| 6  | 4.273595000  | 0.791415000  | 0.644877000  |
| 6  | 4.955001000  | -1.660851000 | 1.029794000  |
| 1  | 4.673427000  | -2.674009000 | 0.789792000  |
| 6  | 5.323669000  | 1.402968000  | 1.365846000  |
| 1  | 5.272848000  | 2.479965000  | 1.392142000  |
| 6  | -5.957613000 | 0.344890000  | 2.581071000  |
| 1  | -6.371635000 | 0.086897000  | 3.549902000  |
| 6  | -4.748977000 | -0.275247000 | 2.289250000  |
| 1  | -4.399639000 | -0.947319000 | 3.058582000  |
| 6  | -6.727042000 | 1.210865000  | 1.809932000  |
| 1  | -7.674307000 | 1.529584000  | 2.225132000  |
| 6  | -6.391523000 | 1.700934000  | 0.550809000  |
| 1  | -7.133639000 | 2.340277000  | 0.084802000  |
| 6  | 6.773121000  | -0.443997000 | 2.285059000  |

|   |              |              |              |
|---|--------------|--------------|--------------|
| 1 | 7.661067000  | -0.617985000 | 2.878911000  |
| 6 | 6.097322000  | -1.567005000 | 1.809482000  |
| 1 | 6.532288000  | -2.522849000 | 2.082121000  |
| 6 | 6.405278000  | 0.877624000  | 2.065341000  |
| 1 | 7.050688000  | 1.624575000  | 2.515563000  |
| 6 | 2.611734000  | -2.367884000 | -0.629060000 |
| 1 | 1.520834000  | -2.377170000 | -0.581679000 |
| 1 | 2.965589000  | -3.083334000 | 0.115062000  |
| 6 | 3.327304000  | 2.978894000  | -0.126173000 |
| 1 | 2.988369000  | 3.197891000  | -1.142908000 |
| 1 | 4.342449000  | 3.376249000  | -0.050845000 |
| 6 | -2.971620000 | 1.618864000  | -2.021085000 |
| 1 | -3.889673000 | 1.417702000  | -2.581802000 |
| 1 | -2.156030000 | 1.219104000  | -2.626475000 |
| 6 | -2.447452000 | -2.028462000 | 2.000206000  |
| 1 | -2.444163000 | -1.615187000 | 3.013870000  |
| 1 | -1.417025000 | -2.315217000 | 1.785367000  |
| 6 | 3.021897000  | -2.831402000 | -2.048470000 |
| 1 | 2.590025000  | -2.111809000 | -2.751536000 |
| 6 | -2.785709000 | 3.148596000  | -1.862574000 |
| 1 | -3.528696000 | 3.520151000  | -1.150377000 |
| 6 | -3.338701000 | -3.295023000 | 1.953648000  |
| 1 | -4.382240000 | -2.987975000 | 2.071171000  |
| 6 | 2.391237000  | 3.733477000  | 0.850857000  |
| 1 | 1.392261000  | 3.305982000  | 0.729443000  |

|   |              |              |              |
|---|--------------|--------------|--------------|
| 6 | -1.394120000 | 3.512137000  | -1.324624000 |
| 1 | -0.615157000 | 3.187617000  | -2.019892000 |
| 1 | -1.195641000 | 3.039231000  | -0.363532000 |
| 1 | -1.304348000 | 4.593671000  | -1.198915000 |
| 6 | -3.046845000 | 3.822093000  | -3.222169000 |
| 1 | -2.343241000 | 3.459787000  | -3.976278000 |
| 1 | -2.924681000 | 4.903967000  | -3.146179000 |
| 1 | -4.058153000 | 3.622504000  | -3.584593000 |
| 6 | 2.385285000  | -4.203850000 | -2.328612000 |
| 1 | 2.611970000  | -4.532726000 | -3.344559000 |
| 1 | 1.300691000  | -4.160290000 | -2.221742000 |
| 1 | 2.770497000  | -4.962278000 | -1.640044000 |
| 6 | 4.542588000  | -2.866652000 | -2.265564000 |
| 1 | 5.017367000  | -3.609751000 | -1.618590000 |
| 1 | 5.003876000  | -1.898366000 | -2.066712000 |
| 1 | 4.770146000  | -3.137397000 | -3.298802000 |
| 6 | -3.212622000 | -4.044615000 | 0.619307000  |
| 1 | -3.434965000 | -3.401772000 | -0.231464000 |
| 1 | -3.896697000 | -4.895931000 | 0.594930000  |
| 1 | -2.197523000 | -4.422653000 | 0.478462000  |
| 6 | -2.973473000 | -4.204437000 | 3.140780000  |
| 1 | -3.592959000 | -5.102920000 | 3.142145000  |
| 1 | -3.114685000 | -3.697704000 | 4.098794000  |
| 1 | -1.929172000 | -4.522137000 | 3.079379000  |
| 6 | 2.336017000  | 5.217391000  | 0.446430000  |



|   |             |             |              |
|---|-------------|-------------|--------------|
| 1 | 1.649038000 | 5.766474000 | 1.092647000  |
| 1 | 1.994702000 | 5.338903000 | -0.583938000 |
| 1 | 3.320202000 | 5.687444000 | 0.533226000  |
| 6 | 2.790173000 | 3.576329000 | 2.325568000  |
| 1 | 2.830280000 | 2.528353000 | 2.622605000  |
| 1 | 2.059790000 | 4.072813000 | 2.967622000  |
| 1 | 3.765767000 | 4.029721000 | 2.524072000  |

**Coordinates of the optimized geometry of compound E**

|    |              |              |              |
|----|--------------|--------------|--------------|
| 32 | -0.798182000 | 0.456189000  | -1.060946000 |
| 32 | 1.071150000  | 0.912176000  | 0.588141000  |
| 34 | 1.246538000  | 2.947822000  | 1.496022000  |
| 34 | -0.462964000 | 1.220886000  | -3.138577000 |
| 7  | 2.595332000  | 0.138961000  | -0.330535000 |
| 7  | -2.547605000 | 0.911725000  | -0.354486000 |
| 6  | 3.099049000  | -0.984466000 | 0.223254000  |
| 7  | -1.467098000 | -1.356183000 | -0.847033000 |
| 7  | 1.412236000  | -0.537644000 | 1.832115000  |
| 6  | -4.800457000 | 0.059288000  | -0.145200000 |
| 1  | -5.120560000 | 1.082717000  | -0.265878000 |
| 6  | -2.744942000 | -1.446471000 | -0.411156000 |
| 6  | -3.403079000 | -0.125990000 | -0.261604000 |
| 6  | 2.420445000  | -1.375302000 | 1.487568000  |
| 6  | 4.171167000  | -1.696227000 | -0.368938000 |
| 1  | 4.542689000  | -1.252486000 | -1.278743000 |

|   |              |              |              |
|---|--------------|--------------|--------------|
| 6 | 2.786445000  | -2.471880000 | 2.296463000  |
| 1 | 2.188169000  | -2.580427000 | 3.187091000  |
| 6 | -4.640162000 | -3.008864000 | 0.291996000  |
| 1 | -4.791015000 | -4.057074000 | 0.526763000  |
| 6 | -3.336500000 | -2.681347000 | -0.066842000 |
| 1 | -2.659236000 | -3.522405000 | -0.089727000 |
| 6 | -5.777101000 | -2.210452000 | 0.349374000  |
| 1 | -6.710656000 | -2.700778000 | 0.592722000  |
| 6 | -5.827751000 | -0.838919000 | 0.105761000  |
| 1 | -6.816075000 | -0.393557000 | 0.140560000  |
| 6 | 4.681122000  | -3.658346000 | 1.131344000  |
| 1 | 5.338852000  | -4.512889000 | 1.221350000  |
| 6 | 4.842822000  | -2.848822000 | 0.007876000  |
| 1 | 5.625089000  | -3.154276000 | -0.678621000 |
| 6 | 3.757472000  | -3.458174000 | 2.148643000  |
| 1 | 3.782753000  | -4.183193000 | 2.955068000  |
| 6 | 3.116444000  | 0.805091000  | -1.549373000 |
| 1 | 2.247031000  | 1.175146000  | -2.096221000 |
| 1 | 3.601247000  | 0.081889000  | -2.207618000 |
| 6 | 0.763748000  | -0.499294000 | 3.160191000  |
| 1 | 0.669550000  | 0.561534000  | 3.405807000  |
| 1 | 1.420676000  | -0.935207000 | 3.915492000  |
| 6 | -2.963591000 | 2.334936000  | -0.293918000 |
| 1 | -3.676375000 | 2.533769000  | -1.101623000 |
| 1 | -2.071662000 | 2.916638000  | -0.527615000 |

|   |              |              |              |
|---|--------------|--------------|--------------|
| 6 | -0.630215000 | -2.543197000 | -1.121147000 |
| 1 | -0.611080000 | -3.182534000 | -0.232771000 |
| 1 | 0.390692000  | -2.185930000 | -1.267945000 |
| 6 | 4.066641000  | 1.994304000  | -1.264692000 |
| 1 | 3.524977000  | 2.683350000  | -0.611589000 |
| 6 | -3.547329000 | 2.854765000  | 1.046678000  |
| 1 | -4.555641000 | 2.452956000  | 1.179049000  |
| 6 | -1.035543000 | -3.392236000 | -2.355850000 |
| 1 | -2.116735000 | -3.551870000 | -2.320410000 |
| 6 | -0.639004000 | -1.143905000 | 3.240732000  |
| 1 | -1.243116000 | -0.701787000 | 2.441946000  |
| 6 | -2.714051000 | 2.446640000  | 2.268667000  |
| 1 | -1.684398000 | 2.796195000  | 2.179539000  |
| 1 | -2.693502000 | 1.362590000  | 2.392833000  |
| 1 | -3.144495000 | 2.876440000  | 3.176144000  |
| 6 | -3.669833000 | 4.387436000  | 0.945011000  |
| 1 | -2.682879000 | 4.848208000  | 0.866827000  |
| 1 | -4.159435000 | 4.791731000  | 1.832636000  |
| 1 | -4.255116000 | 4.688325000  | 0.072649000  |
| 6 | 4.362289000  | 2.715662000  | -2.591742000 |
| 1 | 4.986184000  | 3.593996000  | -2.416714000 |
| 1 | 3.442909000  | 3.046791000  | -3.077103000 |
| 1 | 4.896820000  | 2.061546000  | -3.287423000 |
| 6 | 5.365689000  | 1.586995000  | -0.552683000 |
| 1 | 5.971893000  | 0.922864000  | -1.176097000 |

|   |              |              |              |
|---|--------------|--------------|--------------|
| 1 | 5.169079000  | 1.085262000  | 0.395563000  |
| 1 | 5.966053000  | 2.472428000  | -0.334434000 |
| 6 | -0.702006000 | -2.695854000 | -3.683261000 |
| 1 | -1.148166000 | -1.704923000 | -3.752747000 |
| 1 | -1.058865000 | -3.294575000 | -4.524260000 |
| 1 | 0.378362000  | -2.571609000 | -3.795258000 |
| 6 | -0.345955000 | -4.766192000 | -2.266763000 |
| 1 | -0.609224000 | -5.383150000 | -3.127331000 |
| 1 | -0.634155000 | -5.309777000 | -1.363258000 |
| 1 | 0.741993000  | -4.656348000 | -2.260172000 |
| 6 | -1.284812000 | -0.771770000 | 4.587381000  |
| 1 | -2.293293000 | -1.182868000 | 4.659430000  |
| 1 | -1.352381000 | 0.310116000  | 4.710628000  |
| 1 | -0.702949000 | -1.171183000 | 5.422819000  |
| 6 | -0.626420000 | -2.667841000 | 3.042433000  |
| 1 | -0.154979000 | -2.951378000 | 2.100841000  |
| 1 | -1.645441000 | -3.059676000 | 3.037893000  |
| 1 | -0.087607000 | -3.163760000 | 3.854861000  |

**Coordinates of the optimized geometry of compound II**

|    |              |              |              |
|----|--------------|--------------|--------------|
| 32 | 1.779523000  | -0.392561000 | 1.040231000  |
| 32 | -1.872615000 | 0.188842000  | 1.157281000  |
| 34 | -0.029280000 | 0.304103000  | -0.531572000 |
| 7  | -3.011028000 | -1.137187000 | 0.202239000  |
| 7  | 3.253623000  | 0.915157000  | 0.711404000  |

|   |              |              |              |
|---|--------------|--------------|--------------|
| 6 | -4.075814000 | -0.674102000 | -0.477427000 |
| 7 | 2.830369000  | -1.347074000 | -0.353906000 |
| 7 | -3.201565000 | 1.384606000  | 0.291655000  |
| 6 | 5.458935000  | 1.240484000  | -0.243065000 |
| 1 | 5.550941000  | 2.080296000  | 0.428589000  |
| 6 | 3.938921000  | -0.745485000 | -0.821285000 |
| 6 | 4.235903000  | 0.532297000  | -0.130513000 |
| 6 | -4.195619000 | 0.807477000  | -0.416165000 |
| 6 | -4.973233000 | -1.530599000 | -1.166266000 |
| 1 | -4.714958000 | -2.576745000 | -1.110881000 |
| 6 | -5.249634000 | 1.556305000  | -0.994705000 |
| 1 | -5.162107000 | 2.621873000  | -0.854832000 |
| 6 | 5.912842000  | -0.904292000 | -2.443415000 |
| 1 | 6.240665000  | -1.519124000 | -3.275352000 |
| 6 | 4.696908000  | -1.282883000 | -1.894352000 |
| 1 | 4.251533000  | -2.149074000 | -2.360863000 |
| 6 | 6.784527000  | 0.119217000  | -2.074118000 |
| 1 | 7.713791000  | 0.197302000  | -2.623449000 |
| 6 | 6.564464000  | 1.050678000  | -1.063734000 |
| 1 | 7.368122000  | 1.761775000  | -0.901871000 |
| 6 | -6.792561000 | -0.079342000 | -2.138752000 |
| 1 | -7.705348000 | -0.129655000 | -2.718052000 |
| 6 | -6.136114000 | -1.280583000 | -1.879863000 |
| 1 | -6.606843000 | -2.167422000 | -2.291709000 |
| 6 | -6.371588000 | 1.179481000  | -1.722297000 |

|   |              |              |              |
|---|--------------|--------------|--------------|
| 1 | -7.007571000 | 2.006683000  | -2.020475000 |
| 6 | -2.606692000 | -2.550622000 | 0.284936000  |
| 1 | -1.520134000 | -2.565144000 | 0.166643000  |
| 1 | -3.010599000 | -3.133736000 | -0.544469000 |
| 6 | -3.121821000 | 2.827739000  | 0.591214000  |
| 1 | -2.721361000 | 2.906525000  | 1.606064000  |
| 1 | -4.117010000 | 3.279020000  | 0.620536000  |
| 6 | 3.381633000  | 2.102392000  | 1.580048000  |
| 1 | 4.333013000  | 2.056616000  | 2.122175000  |
| 1 | 2.595189000  | 2.025895000  | 2.335289000  |
| 6 | 2.347841000  | -2.641073000 | -0.867605000 |
| 1 | 2.330694000  | -2.629181000 | -1.961360000 |
| 1 | 1.306022000  | -2.735140000 | -0.554802000 |
| 6 | -2.961398000 | -3.235371000 | 1.628295000  |
| 1 | -2.516578000 | -2.627767000 | 2.423240000  |
| 6 | 3.257449000  | 3.481978000  | 0.883381000  |
| 1 | 3.925066000  | 3.493181000  | 0.017273000  |
| 6 | 3.135344000  | -3.879769000 | -0.371286000 |
| 1 | 4.190187000  | -3.740320000 | -0.626728000 |
| 6 | -2.194692000 | 3.648672000  | -0.340568000 |
| 1 | -1.210367000 | 3.176163000  | -0.300552000 |
| 6 | 1.832079000  | 3.749730000  | 0.381843000  |
| 1 | 1.131062000  | 3.793933000  | 1.220181000  |
| 1 | 1.488774000  | 2.967481000  | -0.293495000 |
| 1 | 1.785303000  | 4.705913000  | -0.144538000 |

|   |              |              |              |
|---|--------------|--------------|--------------|
| 6 | 3.717159000  | 4.581393000  | 1.857724000  |
| 1 | 3.094017000  | 4.590138000  | 2.756457000  |
| 1 | 3.640444000  | 5.565916000  | 1.392775000  |
| 1 | 4.754380000  | 4.438012000  | 2.170652000  |
| 6 | -2.316612000 | -4.631622000 | 1.674191000  |
| 1 | -2.512386000 | -5.116995000 | 2.631982000  |
| 1 | -1.233934000 | -4.575397000 | 1.543612000  |
| 1 | -2.719208000 | -5.275754000 | 0.887085000  |
| 6 | -4.474745000 | -3.315038000 | 1.879896000  |
| 1 | -4.965065000 | -3.949308000 | 1.136158000  |
| 1 | -4.940593000 | -2.329783000 | 1.845606000  |
| 1 | -4.675600000 | -3.744116000 | 2.863927000  |
| 6 | 3.034950000  | -4.052197000 | 1.152311000  |
| 1 | 3.397072000  | -3.170451000 | 1.681379000  |
| 1 | 3.624848000  | -4.910235000 | 1.481863000  |
| 1 | 1.998634000  | -4.221166000 | 1.457080000  |
| 6 | 2.626538000  | -5.131966000 | -1.106677000 |
| 1 | 3.177191000  | -6.019174000 | -0.788728000 |
| 1 | 2.740296000  | -5.036506000 | -2.189097000 |
| 1 | 1.567704000  | -5.304922000 | -0.895110000 |
| 6 | -2.076028000 | 5.080683000  | 0.210357000  |
| 1 | -1.382819000 | 5.668786000  | -0.393429000 |
| 1 | -1.709562000 | 5.085816000  | 1.239404000  |
| 1 | -3.044422000 | 5.589665000  | 0.194512000  |
| 6 | -2.645301000 | 3.657524000  | -1.808940000 |

|   |              |             |              |
|---|--------------|-------------|--------------|
| 1 | -2.725308000 | 2.647435000 | -2.210084000 |
| 1 | -1.918671000 | 4.197320000 | -2.419819000 |
| 1 | -3.611690000 | 4.155711000 | -1.928421000 |

**Coordinates of the optimized geometry of compound Se<sub>8</sub>**

|    |              |              |              |
|----|--------------|--------------|--------------|
| 34 | 2.085025000  | -1.701408000 | -0.574271000 |
| 34 | 0.271151000  | -2.677131000 | 0.574454000  |
| 34 | -1.701345000 | -2.084970000 | -0.574347000 |
| 34 | -2.677505000 | -0.271197000 | 0.574177000  |
| 34 | 2.677506000  | 0.271198000  | 0.574172000  |
| 34 | 1.701344000  | 2.084969000  | -0.574357000 |
| 34 | -2.085026000 | 1.701406000  | -0.574274000 |
| 34 | -0.271151000 | 2.677133000  | 0.574446000  |

**Coordinates of the optimized geometry of compound S<sub>8</sub>**

|    |              |              |              |
|----|--------------|--------------|--------------|
| 16 | -2.931878000 | 0.001412000  | -0.000100000 |
| 16 | -1.698005000 | -1.807857000 | -0.548690000 |
| 16 | -0.001131000 | -2.276756000 | 0.871850000  |
| 16 | 1.695977000  | -1.809103000 | -0.548901000 |
| 16 | 2.931877000  | -0.001413000 | 0.000067000  |
| 16 | 1.698005000  | 1.807854000  | 0.548690000  |
| 16 | 0.001133000  | 2.276778000  | -0.871832000 |
| 16 | -1.695977000 | 1.809085000  | 0.548916000  |

**Coordinates of the optimized geometry of compound (Me<sub>3</sub>Si)<sub>2</sub>S**



|    |              |              |              |
|----|--------------|--------------|--------------|
| 16 | 0.000000000  | 1.261545000  | 0.000001000  |
| 14 | 1.866507000  | -0.037890000 | -0.001246000 |
| 14 | -1.866507000 | -0.037890000 | 0.001245000  |
| 6  | 3.242870000  | 1.179365000  | -0.484159000 |
| 1  | 3.280042000  | 2.016620000  | 0.212874000  |
| 1  | 4.216324000  | 0.683899000  | -0.474491000 |
| 1  | 3.072164000  | 1.581708000  | -1.482490000 |
| 6  | 2.165520000  | -0.736236000 | 1.742490000  |
| 1  | 1.371997000  | -1.420099000 | 2.042444000  |
| 1  | 3.113512000  | -1.278610000 | 1.779226000  |
| 1  | 2.205620000  | 0.071781000  | 2.472994000  |
| 6  | -1.726969000 | -1.445717000 | 1.274677000  |
| 1  | -0.955036000 | -2.165467000 | 1.001324000  |
| 1  | -1.491748000 | -1.052083000 | 2.263320000  |
| 1  | -2.675604000 | -1.984097000 | 1.340450000  |
| 6  | -3.242870000 | 1.179367000  | 0.484152000  |
| 1  | -3.072165000 | 1.581716000  | 1.482481000  |
| 1  | -3.280043000 | 2.016618000  | -0.212886000 |
| 1  | -4.216324000 | 0.683900000  | 0.474488000  |
| 6  | -2.165517000 | -0.736241000 | -1.742488000 |
| 1  | -3.113511000 | -1.278610000 | -1.779226000 |
| 1  | -2.205610000 | 0.071775000  | -2.472994000 |
| 1  | -1.371996000 | -1.420108000 | -2.042438000 |
| 6  | 1.726966000  | -1.445720000 | -1.274673000 |
| 1  | 0.955033000  | -2.165469000 | -1.001318000 |

|   |             |              |              |
|---|-------------|--------------|--------------|
| 1 | 1.491744000 | -1.052089000 | -2.263317000 |
| 1 | 2.675601000 | -1.984101000 | -1.340445000 |

**Coordinates of the optimized geometry of compound (Me<sub>3</sub>SiS)<sub>2</sub>**

|    |              |              |              |
|----|--------------|--------------|--------------|
| 16 | 0.736178000  | -0.951318000 | -0.872176000 |
| 16 | -0.736178000 | -0.951309000 | 0.872186000  |
| 14 | 2.497524000  | 0.188368000  | 0.068051000  |
| 14 | -2.497524000 | 0.188366000  | -0.068054000 |
| 6  | 3.787228000  | 0.166352000  | -1.328106000 |
| 1  | 3.416695000  | 0.676336000  | -2.217325000 |
| 1  | 4.700315000  | 0.671365000  | -1.004945000 |
| 1  | 4.047179000  | -0.855091000 | -1.605616000 |
| 6  | 1.956018000  | 1.951162000  | 0.513822000  |
| 1  | 1.138726000  | 1.931207000  | 1.234166000  |
| 1  | 2.787940000  | 2.502556000  | 0.958288000  |
| 1  | 1.619983000  | 2.493500000  | -0.369663000 |
| 6  | -3.787214000 | 0.166398000  | 1.328117000  |
| 1  | -3.416674000 | 0.676413000  | 2.217315000  |
| 1  | -4.700305000 | 0.671399000  | 1.004947000  |
| 1  | -4.047161000 | -0.855036000 | 1.605664000  |
| 6  | -1.956009000 | 1.951145000  | -0.513876000 |
| 1  | -1.138737000 | 1.931167000  | -1.234241000 |
| 1  | -2.787937000 | 2.502540000  | -0.958330000 |

|   |              |              |              |
|---|--------------|--------------|--------------|
| 1 | -1.619945000 | 2.493497000  | 0.369590000  |
| 6 | 3.075443000  | -0.772629000 | 1.596997000  |
| 1 | 3.396112000  | -1.777035000 | 1.321185000  |
| 1 | 3.912945000  | -0.263375000 | 2.079505000  |
| 1 | 2.268061000  | -0.864868000 | 2.323232000  |
| 6 | -3.075465000 | -0.772665000 | -1.596970000 |
| 1 | -3.396159000 | -1.777054000 | -1.321126000 |
| 1 | -3.912953000 | -0.263405000 | -2.079494000 |
| 1 | -2.268084000 | -0.864948000 | -2.323200000 |

**Coordinates of the optimized geometry of compound 2**

|   |              |              |              |
|---|--------------|--------------|--------------|
| 6 | -3.168722000 | -1.249633000 | 1.033048000  |
| 6 | -4.445126000 | -0.812804000 | 1.352413000  |
| 6 | -5.067872000 | 0.409777000  | 1.104132000  |
| 6 | -4.485606000 | 1.504668000  | 0.477406000  |
| 6 | -3.192114000 | 1.678737000  | -0.004059000 |
| 6 | -2.074327000 | 0.812404000  | -0.046125000 |
| 6 | -2.083009000 | -0.610229000 | 0.381651000  |
| 7 | -0.932825000 | -1.247033000 | 0.092470000  |
| 7 | -0.887607000 | 1.200317000  | -0.564890000 |
| 6 | -0.690048000 | 2.539979000  | -1.155111000 |
| 1 | 0.216613000  | 2.487475000  | -1.763110000 |
| 1 | -1.511657000 | 2.754997000  | -1.846953000 |
| 6 | -0.624602000 | -2.646581000 | 0.439452000  |
| 1 | 0.400954000  | -2.648308000 | 0.815316000  |

|    |              |              |              |
|----|--------------|--------------|--------------|
| 1  | -1.249991000 | -3.001945000 | 1.259739000  |
| 6  | -0.541224000 | 3.716771000  | -0.152539000 |
| 1  | -1.303882000 | 3.603994000  | 0.623087000  |
| 6  | -0.794911000 | 5.044163000  | -0.889771000 |
| 1  | -1.800108000 | 5.086003000  | -1.316926000 |
| 1  | -0.683711000 | 5.890567000  | -0.209896000 |
| 1  | -0.078766000 | 5.178649000  | -1.705350000 |
| 6  | 0.832267000  | 3.722562000  | 0.534643000  |
| 1  | 1.040151000  | 2.776543000  | 1.032018000  |
| 1  | 1.626726000  | 3.898091000  | -0.197018000 |
| 1  | 0.883820000  | 4.520629000  | 1.278641000  |
| 6  | -0.718832000 | -3.629121000 | -0.753328000 |
| 1  | -0.077529000 | -3.231932000 | -1.547577000 |
| 6  | -2.144331000 | -3.757909000 | -1.311987000 |
| 1  | -2.818677000 | -4.193752000 | -0.569538000 |
| 1  | -2.549204000 | -2.790672000 | -1.611610000 |
| 1  | -2.153769000 | -4.408783000 | -2.188769000 |
| 6  | -0.162853000 | -4.999638000 | -0.328741000 |
| 1  | -0.763994000 | -5.433846000 | 0.475137000  |
| 1  | -0.176345000 | -5.698629000 | -1.166910000 |
| 1  | 0.866817000  | -4.921028000 | 0.025680000  |
| 32 | 0.486244000  | -0.201743000 | -0.817163000 |
| 16 | 1.791503000  | 0.033323000  | 1.167821000  |
| 14 | 3.909612000  | -0.112237000 | 0.388777000  |
| 6  | 4.254093000  | 1.279382000  | -0.866048000 |

|   |              |              |              |
|---|--------------|--------------|--------------|
| 1 | 3.592401000  | 1.199133000  | -1.729291000 |
| 1 | 4.097469000  | 2.256134000  | -0.407739000 |
| 1 | 5.285754000  | 1.230091000  | -1.223167000 |
| 6 | 5.026242000  | 0.082830000  | 1.917951000  |
| 1 | 4.824645000  | -0.702308000 | 2.647075000  |
| 1 | 6.080546000  | 0.026409000  | 1.636419000  |
| 1 | 4.853176000  | 1.043345000  | 2.403812000  |
| 6 | 4.195051000  | -1.810742000 | -0.426129000 |
| 1 | 3.997286000  | -2.613835000 | 0.284573000  |
| 1 | 3.537771000  | -1.948330000 | -1.285504000 |
| 1 | 5.228178000  | -1.905117000 | -0.769727000 |
| 1 | -2.975072000 | -2.272645000 | 1.316162000  |
| 1 | -5.055812000 | -1.551387000 | 1.861161000  |
| 1 | -6.095498000 | 0.513613000  | 1.427280000  |
| 1 | -5.127786000 | 2.370626000  | 0.355345000  |
| 1 | -3.010378000 | 2.659457000  | -0.415362000 |

**Coordinates of the optimized geometry of compound 3**

|    |              |              |              |
|----|--------------|--------------|--------------|
| 32 | -1.761335000 | -0.627437000 | -0.330431000 |
| 32 | 1.879465000  | 0.567020000  | -0.448144000 |
| 34 | 1.683770000  | 1.632435000  | -2.389340000 |
| 34 | -1.391302000 | -2.092560000 | -1.961690000 |
| 34 | 0.002643000  | 0.240092000  | 1.063678000  |
| 7  | 2.899286000  | -1.053104000 | -0.286005000 |
| 7  | -3.011297000 | 0.779204000  | -0.754455000 |

|   |              |              |              |
|---|--------------|--------------|--------------|
| 6 | 3.907978000  | -1.003980000 | 0.611179000  |
| 7 | -3.033633000 | -1.021832000 | 1.066526000  |
| 7 | 3.196013000  | 1.253733000  | 0.774700000  |
| 6 | -5.295141000 | 1.491281000  | -0.413571000 |
| 1 | -5.209334000 | 1.973899000  | -1.375335000 |
| 6 | -4.108244000 | -0.200480000 | 1.102077000  |
| 6 | -4.150803000 | 0.753012000  | -0.033688000 |
| 6 | 4.087011000  | 0.338866000  | 1.227480000  |
| 6 | 4.700315000  | -2.137329000 | 0.906114000  |
| 1 | 4.429011000  | -3.019866000 | 0.349267000  |
| 6 | 5.090766000  | 0.674574000  | 2.158184000  |
| 1 | 5.060634000  | 1.701203000  | 2.486978000  |
| 6 | -6.239460000 | 0.445422000  | 2.351603000  |
| 1 | -6.722773000 | 0.244291000  | 3.301514000  |
| 6 | -5.030152000 | -0.217845000 | 2.169205000  |
| 1 | -4.750007000 | -0.861838000 | 2.989682000  |
| 6 | -6.934270000 | 1.285626000  | 1.489265000  |
| 1 | -7.902038000 | 1.638920000  | 1.820727000  |
| 6 | -6.503648000 | 1.708151000  | 0.232762000  |
| 1 | -7.204373000 | 2.325009000  | -0.319254000 |
| 6 | 6.421990000  | -1.418804000 | 2.602563000  |
| 1 | 7.253289000  | -1.795399000 | 3.184136000  |
| 6 | 5.772518000  | -2.324110000 | 1.765958000  |
| 1 | 6.167436000  | -3.334215000 | 1.774307000  |
| 6 | 6.100173000  | -0.076191000 | 2.752759000  |

|   |              |              |              |
|---|--------------|--------------|--------------|
| 1 | 6.720578000  | 0.480555000  | 3.446669000  |
| 6 | 2.508144000  | -2.241681000 | -1.078955000 |
| 1 | 1.417918000  | -2.234081000 | -1.149808000 |
| 1 | 2.776210000  | -3.159322000 | -0.552538000 |
| 6 | 3.267291000  | 2.709866000  | 1.021000000  |
| 1 | 3.024036000  | 3.181696000  | 0.065746000  |
| 1 | 4.291340000  | 3.001534000  | 1.261914000  |
| 6 | -2.803684000 | 1.645366000  | -1.939144000 |
| 1 | -3.589230000 | 1.443223000  | -2.674898000 |
| 1 | -1.866165000 | 1.325519000  | -2.395537000 |
| 6 | -2.782966000 | -2.075237000 | 2.072280000  |
| 1 | -2.801975000 | -1.631172000 | 3.073101000  |
| 1 | -1.762179000 | -2.425518000 | 1.911454000  |
| 6 | 3.080563000  | -2.258124000 | -2.518534000 |
| 1 | 2.738667000  | -1.339480000 | -3.002313000 |
| 6 | -2.729158000 | 3.169397000  | -1.666454000 |
| 1 | -3.689575000 | 3.505829000  | -1.265283000 |
| 6 | -3.737954000 | -3.295027000 | 2.027587000  |
| 1 | -4.767605000 | -2.932659000 | 2.098568000  |
| 6 | 2.291936000  | 3.254587000  | 2.091858000  |
| 1 | 1.282649000  | 2.966535000  | 1.784600000  |
| 6 | -1.637013000 | 3.537008000  | -0.651796000 |
| 1 | -0.652002000 | 3.253962000  | -1.026546000 |
| 1 | -1.788420000 | 3.035370000  | 0.304345000  |
| 1 | -1.638620000 | 4.614928000  | -0.473016000 |

|   |              |              |              |
|---|--------------|--------------|--------------|
| 6 | -2.500469000 | 3.887106000  | -3.010258000 |
| 1 | -1.542837000 | 3.592550000  | -3.444161000 |
| 1 | -2.484784000 | 4.969175000  | -2.868277000 |
| 1 | -3.287178000 | 3.654758000  | -3.732501000 |
| 6 | 2.476541000  | -3.454953000 | -3.274027000 |
| 1 | 2.815248000  | -3.460808000 | -4.311672000 |
| 1 | 1.386890000  | -3.410641000 | -3.273879000 |
| 1 | 2.780653000  | -4.403006000 | -2.819394000 |
| 6 | 4.615709000  | -2.283385000 | -2.572124000 |
| 1 | 5.015603000  | -3.204734000 | -2.138389000 |
| 1 | 5.055693000  | -1.435394000 | -2.045615000 |
| 1 | 4.953382000  | -2.235134000 | -3.609361000 |
| 6 | -3.605772000 | -4.093517000 | 0.722922000  |
| 1 | -3.772907000 | -3.471169000 | -0.155122000 |
| 1 | -4.327669000 | -4.913091000 | 0.705106000  |
| 1 | -2.605527000 | -4.521489000 | 0.626170000  |
| 6 | -3.461399000 | -4.183091000 | 3.254560000  |
| 1 | -4.128506000 | -5.046623000 | 3.262103000  |
| 1 | -3.606553000 | -3.638752000 | 4.191135000  |
| 1 | -2.434604000 | -4.558258000 | 3.239149000  |
| 6 | 2.368604000  | 4.791779000  | 2.096342000  |
| 1 | 1.654579000  | 5.210178000  | 2.807763000  |
| 1 | 2.141625000  | 5.204335000  | 1.111529000  |
| 1 | 3.365993000  | 5.135514000  | 2.385631000  |
| 6 | 2.538776000  | 2.681171000  | 3.495460000  |



|          |                    |                    |                    |
|----------|--------------------|--------------------|--------------------|
| <b>1</b> | <b>2.487727000</b> | <b>1.591735000</b> | <b>3.501270000</b> |
| <b>1</b> | <b>1.783343000</b> | <b>3.050088000</b> | <b>4.192071000</b> |
| <b>1</b> | <b>3.516707000</b> | <b>2.983601000</b> | <b>3.881279000</b> |

## References

- S1. S. Sinhababu, R. K. Siwatch, G. Mukherjee, G. Rajaraman, S. Nagendran, *Inorg. Chem.* **2012**, *51*, 9240.
- S2. Taher, D.; Wallbank, A. I.; Turner, E. A.; Cuthbert, H. L.; Corrigan, J. F. *Eur. J. Inorg. Chem.* **2006**, *22*, 4616.
- S3. Fulmer, G. R.; Miller, A. J. M.; Sherden, N. H.; Gottlieb, H. E.; Nudelman, A.; Stoltz, B. M.; Bercaw, J. E.; Goldberg, K. I. *Organometallics* **2010**, *29*, 2176.
- S4. *SMART: Bruker Molecular Analysis Research Tool*, Version 5.618; Bruker AXS: Madison, WI, 2000.
- S5. *SAINT-NT*, Version 6.04; Bruker AXS: Madison, WI, 2001.
- S6. *SHELXTL-NT*, Version 6.10; Bruker AXS: Madison, WI, 2000.
- S7. M. J. Frisch, G. W. Trucks, H. B. Schlegel, G. E. Scuseria, M. A. Robb, J. R. Cheeseman, G. Scalmani, V. Barone, B. Mennucci, G. A. Petersson, H. Nakatsuji, M. Caricato, X. Li, H. P. Hratchian, A. F. Izmaylov, J. Bloino, G. Zheng, J. L. Sonnenberg, M. Hada, M. Ehara, K. Toyota, R. Fukuda, J. Hasegawa, M. Ishida, T. Nakajima, Y. Honda, O. Kitao, H. Nakai, T. Vreven, J. A. Montgomery, Jr., J. E. Peralta, F. Ogliaro, M. Bearpark, J. J. Heyd, E. Brothers, K. N. Kudin, V. N. Staroverov, R. Kobayashi, J. Normand, K. Raghavachari, A. Rendell, J. C. Burant, S. S. Iyengar, J. Tomasi, M. Cossi, N. Rega, J. M. Millam, M. Klene, J. E. Knox, J. B. Cross, V. Bakken, C. Adamo, J. Jaramillo, R. Gomperts, R. E. Stratmann, O. Yazyev, A. J. Austin, R. Cammi, C. Pomelli, J. W. Ochterski, R. L. Martin, K. Morokuma, V. G. Zakrzewski, G. A. Voth, P. Salvador, J. J. Dannenberg, S. Dapprich, A. D. Daniels, Ö. Farkas, J. B. Foresman, J. V. Ortiz, J. Cioslowski, and D. J. Fox, *Gaussian 09, Revision C. 01*; Gaussian, Inc.: Wallingford, CT, 2010.
- S8. N. N. Greenwood, A. Earnshaw, *Chemistry of the Elements* (2<sup>nd</sup> ed.) Butterworth–Heinemann.
